# Supplementary material for: Genetic risk variants for childhood nephrotic syndrome and corticosteroid response
Source: PubMed Central journal article supplement (PMC10588181; doi:10.3389/fped.2023.1248733), 2023-10-06
Supplement: Datasheet1.pdf [file Datasheet1.pdf]

## *Supplementary Material*

### **Genetic variants for childhood nephrotic syndrome and corticosteroid therapy response**

Rachel K. Cason, Eileen Chambers, Tiffany Tu, Megan Chryst-Stangl, Kinsie Huggins, Brandon M. Lane, Alejandro Ochoa, Annette Jackson, Rasheed A. Gbadegesin\*

\* **Correspondence:** Rasheed Gbadegesin: rasheed.gbadegesin@duke.edu

#### **1 Supplementary Figures and Tables**

##### **Supplementary Table 1 NS Allele Descriptions**

| SNP        | Gene         | Chromosome | NS Risk Allele | Position  | Type                        |
|------------|--------------|------------|----------------|-----------|-----------------------------|
| rs1129740  | HLA-DQA1     | 6          | A              | 32609103  | Missense C34Y               |
| rs9348883  | BTNL2        | 6          | A              | 32358549  | Intronic variant            |
| rs4642516  | HLA-DR/DQ    | 6          | T              | 32657543  | Intergenic                  |
| rs3134996  | HLA-DR/DQ    | 6          | A              | 32636866  | Intergenic                  |
| rs9273371  | Intergenic   | 6          | T              | 32626565  | Intergenic                  |
| rs2637678  | CALHM6       | 6          | T              | 116787378 | Intergenic                  |
| rs56117924 | NPHS1/KIRREL | 19         | A              | 36334182  | Intronic variant            |
| rs6478109  | TFNSF15      | 9          | G              | 117568766 | Upstream transcript variant |
| rs34213471 | TNFRSF11A    | 18         | A              | 60008436  | Intronic variant            |

**Supplementary Table 2** Risk allele frequency for SRNS vs. Controls: <sup>a</sup>P-values from chi square test of independence. \*Significance after Bonferroni correction with  $\alpha=0.05$ . SNP, single nucleotide polymorphism.

| SNP        | Risk Allele | Gene                | Risk AF: Controls<br>Risk/Total<br>(frequency) | Risk AF: SRNS<br>Risk/Total<br>(frequency) | Odds Ratio<br>(95% CI) | P-value <sup>a</sup>     |
|------------|-------------|---------------------|------------------------------------------------|--------------------------------------------|------------------------|--------------------------|
| rs1129740  | A           | <i>HLA-DQA1</i>     | 94628/191328<br>(0.50)                         | 176/326<br>(0.54)                          | 1.2<br>(1.0-1.5)       | 0.1                      |
| rs9348883  | A           | <i>BTNL2</i>        | 15739/264690<br>(0.06)                         | 184/342<br>(0.54)                          | 18.3<br>(14.9-22.8)    | <2.2x10 <sup>-16</sup> * |
| rs4642516  | T           | <i>HLA-DR/DQ</i>    | 138950/264690<br>(0.52)                        | 201/346<br>(0.58)                          | 1.3<br>(1.0-1.6)       | 0.04                     |
| rs3134996  | A           | <i>HLA-DR/DQ</i>    | 94736/264690<br>(0.36)                         | 256/352<br>(0.73)                          | 4.8<br>(3.8-6.0)       | <2.2x10 <sup>-16</sup> * |
| rs9273371  | T           | <i>Intergenic</i>   | 67317/264690<br>(0.25)                         | 119/350<br>(0.34)                          | 1.5<br>(1.2-1.9)       | 2.4x10 <sup>-4</sup> *   |
| rs2637678  | T           | <i>CALHM6</i>       | 167819/264690<br>(0.63)                        | 229/352<br>(0.65)                          | 1.1<br>(0.9-1.3)       | 0.5                      |
| rs56117924 | A           | <i>NPHS1/KIRREL</i> | 14543/264690<br>(0.06)                         | 24/352<br>(0.07)                           | 1.3<br>(0.8-1.9)       | 0.3                      |
| rs6478109  | G           | <i>TNFSF15</i>      | 224655/328718<br>(0.68)                        | 268/350<br>(0.77)                          | 1.5<br>(1.2-1.9)       | 9.4x10 <sup>-4</sup> *   |
| rs34213471 | A           | <i>TNFRSF11A</i>    | 14311/264690<br>(0.05)                         | 30/352<br>(0.09)                           | 1.6<br>(1.1 to 2.4)    | 9.8x10 <sup>-3</sup>     |

**Supplementary Table 3** Odds ratio risk analysis for SSNS vs. SRNS: <sup>a</sup> P-values from Fisher exact test; \*significance after Bonferroni correction with  $\alpha= 0.05$ .

| # Risk Alleles | # SRNS | # SSNS | Total SRNS | Total SSNS | OR  | Lower CI | Upper CI | P-value <sup>a</sup>   |
|----------------|--------|--------|------------|------------|-----|----------|----------|------------------------|
| 0-2            | 17     | 276    | 123        | 592        | 0.2 | 0.1      | 0.3      | 2.1x10 <sup>-12*</sup> |
| 3-6            | 60     | 272    | 123        | 592        | 1.1 | 0.8      | 1.7      | 0.6                    |
| 7-11           | 46     | 44     | 123        | 592        | 7.4 | 4.6      | 12.0     | 8.2x10 <sup>-16*</sup> |

**Supplementary Table 4** Odds ratio risk analysis for SSNS vs. SRNS with ungrouped counts: <sup>a</sup> P-values from Fisher exact test; \*significance after Bonferroni correction with  $\alpha= 0.05$

| # Risk Alleles | # SRNS | # SSNS | Total SRNS | Total SSNS | OR   | Lower CI | Upper CI | P-value <sup>a</sup>   |
|----------------|--------|--------|------------|------------|------|----------|----------|------------------------|
| 0              | 1      | 17     | 123        | 592        | 0.3  | 0.04     | 2.1      | 0.3                    |
| 1              | 6      | 126    | 123        | 592        | 0.2  | 0.1      | 0.4      | 3.0x10 <sup>-6*</sup>  |
| 2              | 10     | 133    | 123        | 592        | 0.3  | 0.2      | 0.6      | 1.7x10 <sup>-4*</sup>  |
| 3              | 24     | 106    | 123        | 592        | 1.1  | 0.7      | 1.8      | 0.7                    |
| 4              | 18     | 66     | 123        | 592        | 1.4  | 0.8      | 2.4      | 0.3                    |
| 5              | 10     | 64     | 123        | 592        | 0.7  | 0.4      | 1.5      | 0.4                    |
| 6              | 8      | 36     | 123        | 592        | 1.1  | 0.5      | 2.4      | 0.8                    |
| 7              | 18     | 17     | 123        | 592        | 5.8  | 2.9      | 11.6     | 1.9x10 <sup>-6*</sup>  |
| 8              | 11     | 16     | 123        | 592        | 3.5  | 1.6      | 7.8      | 2.8x10 <sup>-3*</sup>  |
| 9              | 7      | 9      | 123        | 592        | 3.9  | 1.4      | 10.7     | 1.1x10 <sup>-2</sup>   |
| 10             | 8      | 2      | 123        | 592        | 20.5 | 4.3      | 97.9     | 2.1x10 <sup>-5*</sup>  |
| 11             | 2      | 0      | 123        | 592        | Inf  | NA       | Inf      | 3.0 x 10 <sup>-2</sup> |
| 12             | 0      | 0      | 123        | 592        | NA   | NA       | NA       | 1.0                    |

**Supplementary Table 5** Frequency of homozygous patients for SSNS vs. SRNS risk alleles: <sup>a</sup>P-value calculated using Fisher exact test. \*Significance after Bonferroni correction with  $\alpha= 0.05$ . SNP, single nucleotide polymorphism.

| SNP<br>(gene)                         | Risk<br>Allele | #homozygous SSNS<br>/total SSNS patients<br>(frequency) | #homozygous SRNS<br>/total SRNS patients<br>(frequency) | Odds Ratio<br>(95% CI) | P-value <sup>a</sup>     |
|---------------------------------------|----------------|---------------------------------------------------------|---------------------------------------------------------|------------------------|--------------------------|
| rs1129740<br>( <i>HLA-DQA1</i> )      | G              | 71/614<br>(0.12)                                        | 68/163<br>(0.42)                                        | 5.46<br>(3.6-8.3)      | <2.2x10 <sup>-16</sup> * |
| rs9348883<br>( <i>BTNL2</i> )         | A              | 7/599<br>(0.01)                                         | 18/171<br>(0.11)                                        | 9.9<br>(3.9-28.6)      | 8.9x10 <sup>-8</sup> *   |
| rs4642516<br>( <i>HLA-DR/DQ</i> )     | G              | 51/597<br>(0.09)                                        | 35/173<br>(0.20)                                        | 2.4<br>(1.4-3.8)       | 4.7x10 <sup>-4</sup> *   |
| rs3134996<br>( <i>HLA-DR/DQ</i> )     | T              | 16/598<br>(0.03)                                        | 15/176<br>(0.09)                                        | 3.4<br>(1.5-7.5)       | 1.5x10 <sup>-3</sup> *   |
| rs9273371<br>( <i>intergenic</i> )    | C              | 206/599<br>(0.34)                                       | 78/175<br>(0.45)                                        | 1.5<br>(1.1-2.2)       | 0.02                     |
| rs2637678<br>( <i>CALHM6</i> )        | C              | 25/299<br>(0.04)                                        | 22/176<br>(0.125)                                       | 3.3<br>(1.7-6.2)       | 2.0x10 <sup>-4</sup> *   |
| rs56117924<br>( <i>NPHS1/KIRREL</i> ) | A              | 3/599<br>(0.005)                                        | 0/176<br>(0)                                            | 0<br>(0-8.25)          | 1                        |
| rs6478109<br>( <i>TNFSF15</i> )       | A              | 27/599<br>(0.05)                                        | 11/175<br>(0.06)                                        | 1.4 (0.6-3.0)          | 0.3                      |
| rs34213471<br>( <i>TNFRSF11A</i> )    | C              | 450/599<br>(0.75)                                       | 147/176<br>(0.84)                                       | 1.7<br>(1.1-2.7)       | 0.02                     |

## **1.1 Supplementary Figures**

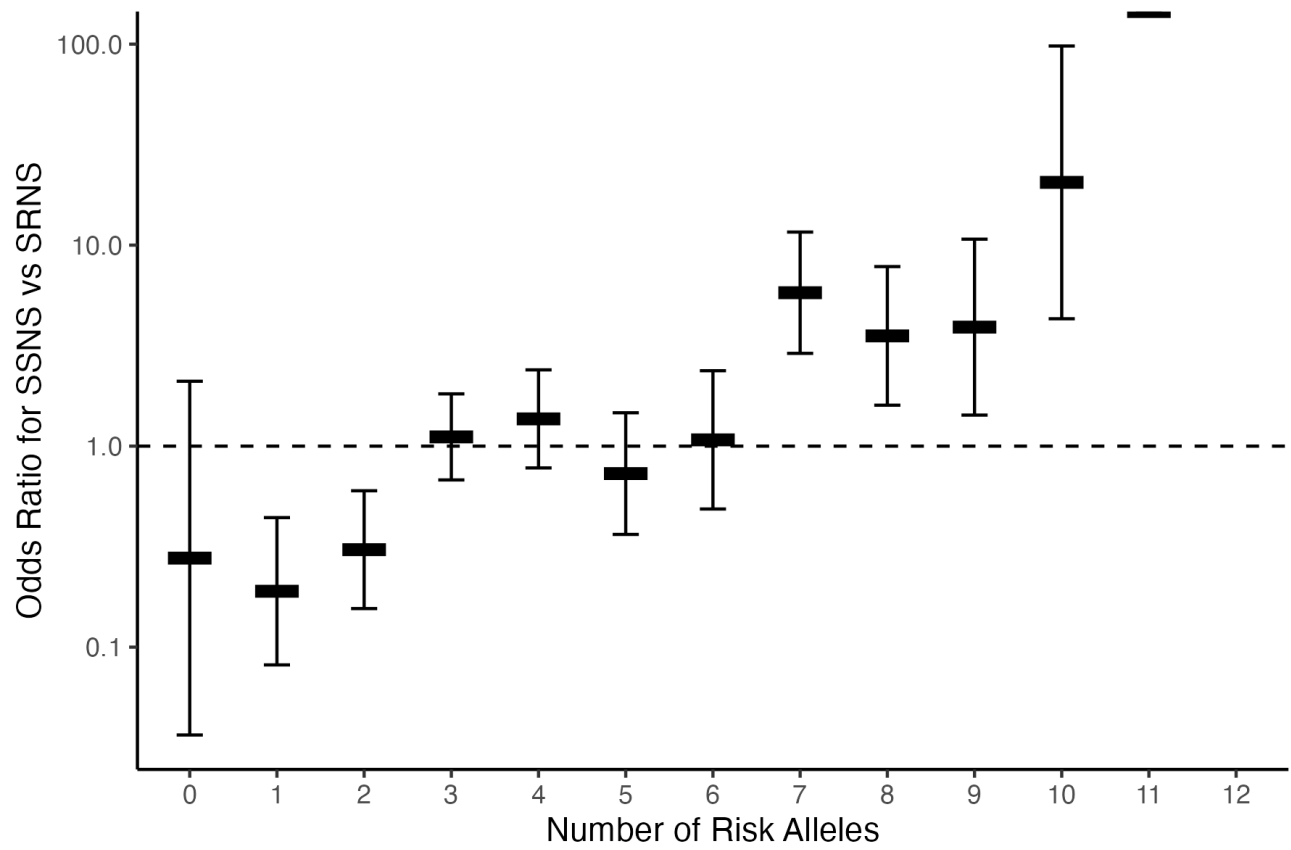

**Supplementary Figure 1** Risk loci burden for patients with SSNS vs. SRNS. Odds ratio for allele burden between SSNS vs. SRNS with ungrouped counts
